# Supplementary material
Source: publisher figshare collection journal article supplement (https://gsapubs.figshare.com/ndownloader/files/23315822)
Supplement: Supplementary file 1 [file 23315822]

Murch, A.P., White, J.D.L., and Carey, R.J., 2019, Unusual fluidal behavior of a silicic magma during fragmentation in a deep subaqueous eruption, Havre volcano, southwestern Pacific Ocean: *Geology*, <https://doi.org/10.1130/G45657.1>

## 1 Supplemental Material

### 2 DR 1 Methods

3 Samples were taken from the caldera floor, walls and rims (Fig. 1) using ROV Jason and employing  
4 push-cores, scoops and vacuum-like ‘slurp’ samplers. A push core is a 3.5” diameter plastic tube open  
5 at one end that is designed to be inserted into sediment, then retrieved. A scoop is a frame holding  
6 both a fine (200  $\mu\text{m}$ ) and coarse (1 mm) netting layers, on a metal rod, intended to be dragged through  
7 the sediment to sample. Vacuum sampling uses a pump to draw in sediment with excess water is  
8 released through a  $>1$  mm mesh and a 1000-200  $\mu\text{m}$  fabric filter. Despite the range in sampling  
9 methods employed no discernible difference in the grainsize characteristics of samples taken by  
10 different methods has been identified.

11 All samples were immediately dried either in an oven at 90  $^{\circ}\text{C}$  or under an array of heat lamps for at  
12 least eight hours. Whole samples were hand sieved onshore, from  $-4\phi$  to  $4\phi$  (from 16 mm to 0.063  
13 mm) in  $\frac{1}{2}\phi$  steps. The fraction remaining in each sieve was weighed on an electronic scale with 0.01-  
14 gram resolution.

15 Grain morphology and microtextures were investigated using secondary electron (SE) and back-  
16 scattered electron (BSE) methods on a Zeiss Sigma VP® Field-Emission-Gun Scanning Electron  
17 Microscope at the University of Otago. For SE (morphological) imaging, grains were mounted on an  
18 SEM stub using carbon tape and then carbon coated. BSE imaging was undertaken on grains mounted  
19 on a carbon coated polished briquette. In both cases, imaging was undertaken using a 15 keV  
20 accelerating voltage and a working distance of between 7.1 to 9.5 mm.

21 Secondary electron imaging was initially employed to conduct visual description of particles features  
22 diagnostic of fragmentation mechanism and define morphology componentry classes. Following this  
23 SEM SE montage image maps of samples were collected to conduct more quantitative examination of  
24 morphology componentry class distribution. Systematic creation of montaged maps was undertaken  
25 on 12 representative samples of S1 and S2 from various locations and depositional environments  
26 around the caldera. Image maps were collected of grain fractions  $3\phi$  (125  $\mu\text{m}$ ),  $4\phi$  (63  $\mu\text{m}$ ), and  
27 smaller than  $4\phi$  (63  $\mu\text{m}$ ) in size. Point counting was then undertaken on the SEM SE montaged image  
28 maps, using a step size approximately 1.5 times the average grain size. At each point the grain was  
29 grouped by its morphology into one of three secondary morphological subgroups; Angular, Curvi-  
30 planar, and Fluidal. Point counting was undertaken until at least 400 points had been grouped, for  
31 each size fraction, or the grains had run out.

32

33 **DR 2** Results of the SEM componentry for seafloor samples containing >75% S1/S2

| Grain size ( $\phi$ )  | Fluidal      |              |              | Angular      |              |              | Curvi-planar |              |              |
|------------------------|--------------|--------------|--------------|--------------|--------------|--------------|--------------|--------------|--------------|
|                        | 3            | 4            | 5            | 3            | 4            | 5            | 3            | 4            | 5            |
| HVR159 Base            | 12.93        | 21.41        | 11.84        | 11.49        | 12.98        | 18.18        | 75.57        | 65.60        | 69.98        |
| HVR159 Bulk            | 19.62        | 9.21         | 7.18         | 12.26        | 15.99        | 19.96        | 68.12        | 74.80        | 72.85        |
| HVR132                 | 11.98        | 14.44        | 4.34         | 6.69         | 16.61        | 17.83        | 81.34        | 68.95        | 77.83        |
| HVR272                 | 18.10        | 6.22         | 4.10         | 1.86         | 7.82         | 13.41        | 80.05        | 85.97        | 82.50        |
| HVR134 Bulk            | 10.66        | 12.89        | 3.43         | 24.45        | 27.65        | 29.74        | 64.89        | 59.46        | 66.83        |
| HVR031                 | 15.20        | 16.82        | 5.62         | 9.45         | 9.55         | 21.20        | 75.36        | 73.64        | 73.19        |
| HVR105                 | 18.56        | 19.36        | 4.85         | 14.13        | 17.40        | 44.80        | 67.31        | 63.24        | 50.35        |
| HVR122                 | 35.34        | 10.10        | 9.13         | 12.37        | 15.40        | 26.94        | 52.30        | 74.49        | 63.93        |
| HVR124                 | 13.25        | 7.41         | 3.83         | 13.49        | 15.90        | 22.46        | 73.25        | 76.69        | 73.71        |
| HVR191                 | 25.38        | 27.88        | 10.10        | 16.41        | 10.22        | 26.12        | 58.21        | 61.90        | 63.78        |
| HVR229                 | 19.17        | 23.35        | 15.73        | 10.63        | 5.79         | 10.67        | 70.21        | 70.86        | 73.60        |
| HVR283                 | 26.35        | 20.37        | 8.45         | 10.80        | 8.41         | 18.07        | 62.85        | 71.21        | 73.48        |
| <i>Average</i>         | <i>18.88</i> | <i>15.79</i> | <i>7.38</i>  | <i>12.00</i> | <i>13.64</i> | <i>22.45</i> | <i>69.12</i> | <i>70.57</i> | <i>70.17</i> |
| <i>Max</i>             | <i>35.34</i> | <i>27.88</i> | <i>15.73</i> | <i>24.45</i> | <i>27.65</i> | <i>44.80</i> | <i>81.34</i> | <i>85.97</i> | <i>82.50</i> |
| <i>Min</i>             | <i>10.66</i> | <i>6.22</i>  | <i>3.43</i>  | <i>1.86</i>  | <i>5.79</i>  | <i>10.67</i> | <i>52.30</i> | <i>59.46</i> | <i>50.35</i> |
| Giant pumice granulate | 5.48         | 3.57         | 1.84         | 82.13        | 74.00        | 49.72        | 12.39        | 22.43        | 48.45        |

34

35

36 **DR 3** Granulating the giant pumice

37 The Giant Pumice granulate was produced during this study using a mortar and pestle. Prior to the  
38 following procedure the mortar and pestle were thoroughly cleaned to remove dust and any fragments  
39 of previous uses. A fragment of Giant Pumice (GP) was place in the mortar at room temperature. The  
40 pestle was then used to attempt to crush the fragment placing a roughly vertically downward force.  
41 The GP fragment did not disintegrate however ash size fragments were produced at the base and top  
42 of the GP fragment where it was in contact with the mortar and pestle, respectively. Ash was likely  
43 produced by a combination of friction with the mortar and pestle and compression.

44 The generated ash was then collected. A fine brush was used to remove all fine the particles. The  
45 generated ash was then sieved in 1  $\phi$  steps. Following this SEM SE montage image maps were  
46 collected for extracts of the 3  $\phi$  (125  $\mu\text{m}$ ), 4  $\phi$  (63  $\mu\text{m}$ ), and smaller than 4  $\phi$  (63  $\mu\text{m}$ ) grain size  
47 fractions. Point counting was conducted on the SEM SE montaged image maps, using a step size  
48 approximately 1.5 times the average grain size. At each point the grain was grouped by its  
49 morphology into one of three morphological groups; Angular, Curvi-planar, and Fluidal. Point  
50 counting was undertaken until at least 400 points had been grouped, for each size fraction, or the  
51 grains had run out. The results of the point counting are presented in DR2.

52 **DR 4** Magma viscosity and its effect on particle rounding

|                                    |                                    |
|------------------------------------|------------------------------------|
| Sample                             | Giant pumice (Carey, et al., 2018) |
| <b>SiO<sub>2</sub></b>             | 71.92                              |
| <b>TiO<sub>2</sub></b>             | 0.47                               |
| <b>Al<sub>2</sub>O<sub>3</sub></b> | 14.01                              |
| <b>Fe<sub>2</sub>O<sub>3</sub></b> | 3.38                               |
| <b>MnO</b>                         | 0.12                               |
| <b>MgO</b>                         | 0.67                               |
| <b>CaO</b>                         | 2.58                               |
| <b>Na<sub>2</sub>O</b>             | 5.14                               |
| <b>K<sub>2</sub>O</b>              | 1.62                               |
| <b>P<sub>2</sub>O<sub>5</sub></b>  | 0.08                               |
| <b>LOI</b>                         | 1.27                               |
| <b>Total</b>                       | 99.71                              |
| <b>H<sub>2</sub>O total (wt%)</b>  | 1                                  |
| Temperature                        | <b>Log Viscosity (Pa s)</b>        |
| <b>750 °C</b>                      | 10 <sup>8.1</sup>                  |
| <b>850 °C</b>                      | 10 <sup>6.7</sup>                  |
| <b>950 °C</b>                      | 10 <sup>5.6</sup>                  |
| <b>1050 °C</b>                     | 10 <sup>4.7</sup>                  |

53

54 Whole rock major element chemistry data for the giant pumice from (Carey, et al., 2018), along with  
55 the viscosity range calculated for a range of temperatures. The approximate saturation water content is  
56 used for a vent of 900 mbsl (Newman and Lowenstern, 2002). Viscosity calculations undertaken  
57 using the methods of (Giordano et al., 2008).

58 The approximate timescale of particle rounding by surface tension ( $T_r$ ) has been calculated using  
59 equation (10) from Wadsworth *et al.* (2017) for Havre ash with diameters of 1, 0.1, and 0.01 mm.

$$T_r = \frac{R\mu}{\Gamma}$$

60 Where R is the particle radius,  $\mu$  is the magma viscosity, and  $\Gamma$  is the melt vapor interfacial tension  
61 here assumed to be 0.3 N m<sup>-1</sup> (Gardner and Ketcham, 2011). Particle rounding timescales calculated  
62 for a range of eruption temperatures are compared with particle quenching timescales. Particle

63 quenching rate was calculated using a lower end cooling rate of  $10^{3.9} \text{ K s}^{-1}$  from (Helo et al., 2013).  
 64 The time taken for a particle to cool from a range of temperatures to a fixed glass transition point of  
 65 approximately  $10^{11.4} \text{ Pa s}$  (Gottsmann et al., 2002)  $\sim 600^\circ\text{C}$  was then calculated.

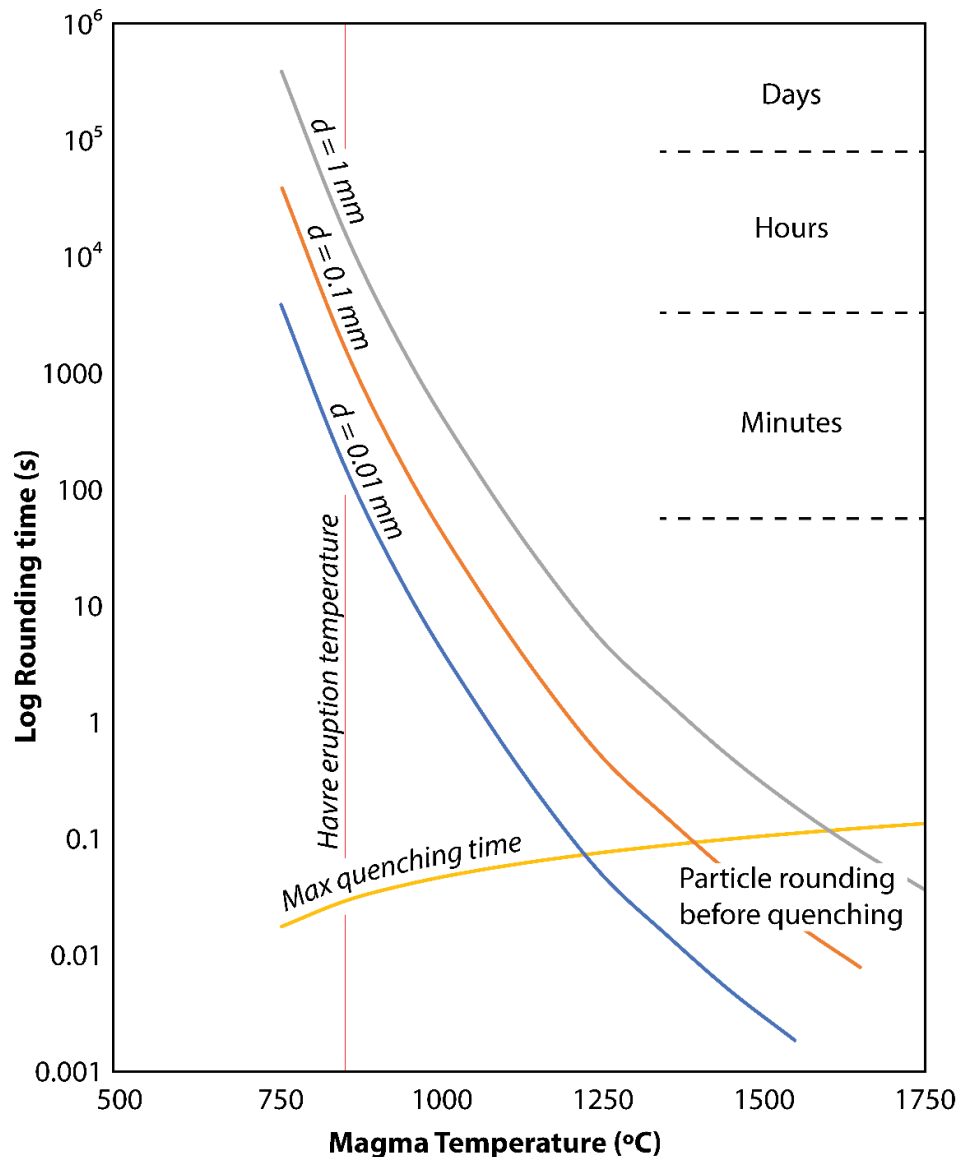

66  
 67 There are several limitations involved in this analysis. Cooling rate dependence of the glass transition  
 68 temperature produces variation of approximately 80 K, for cooling rates of between  $0.000017$ - $0.105$   
 69  $\text{K s}^{-1}$  (Gottsmann and Dingwell, 2001, 2002). In addition, particle cooling from the outside rim in  
 70 would restrict surface tension rounding processes first therefore lowering quenching timescales in the  
 71 natural environment. Ash particles are also likely to have cooled from the eruption temperature  
 72 following fragmentation. The timescale presented here therefore represents an upper limit to the  
 73 quenching timescale experience by the Havre ash on contact with water.

74 **References cited**

75 Carey, R., Adam Soule, S., Manga, M., White, J.D.L., McPhie, J., Wysoczanski, R., Jutzeler, M.,  
76 Tani, K., Yoerger, D., Fornari, D., Caratori-Tontini, F., Houghton, B., Mitchell, S., Ikegami, F.,  
77 et al., 2018, The largest deep-ocean silicic volcanic eruption of the past century: Science  
78 Advances, v. 4, doi: 10.1126/sciadv.1701121.

79 Gardner, J.E., and Ketcham, R.A., 2011, Bubble nucleation in rhyolite and dacite melts: Temperature  
80 dependence of surface tension: Contributions to Mineralogy and Petrology, v. 162, p. 929–943,  
81 doi: 10.1007/s00410-011-0632-5.

82 Giordano, D., Russell, J.K., and Dingwell, D.B., 2008, Viscosity of magmatic liquids: A model: Earth  
83 and Planetary Science Letters, v. 271, p. 123–134, doi: 10.1016/j.epsl.2008.03.038.

84 Gottsmann, J., and Dingwell, D.B., 2001, The cooling of frontal flow ramps: A calorimetric study on  
85 the Rocche Rosse rhyolite flow, Lipari, Aeolian Islands, Italy: Terra Nova, v. 13, p. 157–164,  
86 doi: 10.1046/j.1365-3121.2001.00332.x.

87 Gottsmann, J., and Dingwell, D.B., 2002, The thermal history of a spatter-fed lava flow: The 8-ka  
88 pantellerite flow of Mayor Island, New Zealand: Bulletin of Volcanology, v. 64, p. 410–422,  
89 doi: 10.1007/s00445-002-0220-7.

90 Gottsmann, J., Giordano, D., and Dingwell, D.B., 2002, Predicting shear viscosity during volcanic  
91 processes at the glass transition: A calorimetric calibration: Earth and Planetary Science Letters,  
92 v. 198, p. 417–427, doi: 10.1016/S0012-821X(02)00522-8.

93 Helo, C., Clague, D.A., Dingwell, D.B., and Stix, J., 2013, High and highly variable cooling rates  
94 during pyroclastic eruptions on Axial Seamount, Juan de Fuca Ridge: Journal of Volcanology  
95 and Geothermal Research, v. 253, p. 54–64, doi: 10.1016/j.jvolgeores.2012.12.004.

96 Newman, S., and Lowenstern, J.B., 2002, Volatile Calc : a silicate melt – H<sub>2</sub>O – CO<sub>2</sub> solution model  
97 written in Visual Basic for excel: Computers & Geosciences, v. 28, p. 597–604, doi:  
98 doi:10.1016/S0098-3004(01)00081-4.

99 Wadsworth, F.B., Vasseur, J., Llewellyn, E.W., Genareau, K., Cimarelli, C., Dingwell, D.B., Vasseur,  
100 J., Llewellyn, E.W., Genareau, K., Corrado, C., and Dingwell, D.B., 2017, Size limits for  
101 rounding of volcanic ash particles heated by lightning: Journal of Geophysical Research: Solid  
102 Earth, v. 122, p. 1977–1989, doi: 10.1002/2016JB013864.

## 104 DR 5 Conduit wall viscous heating rate at Havre

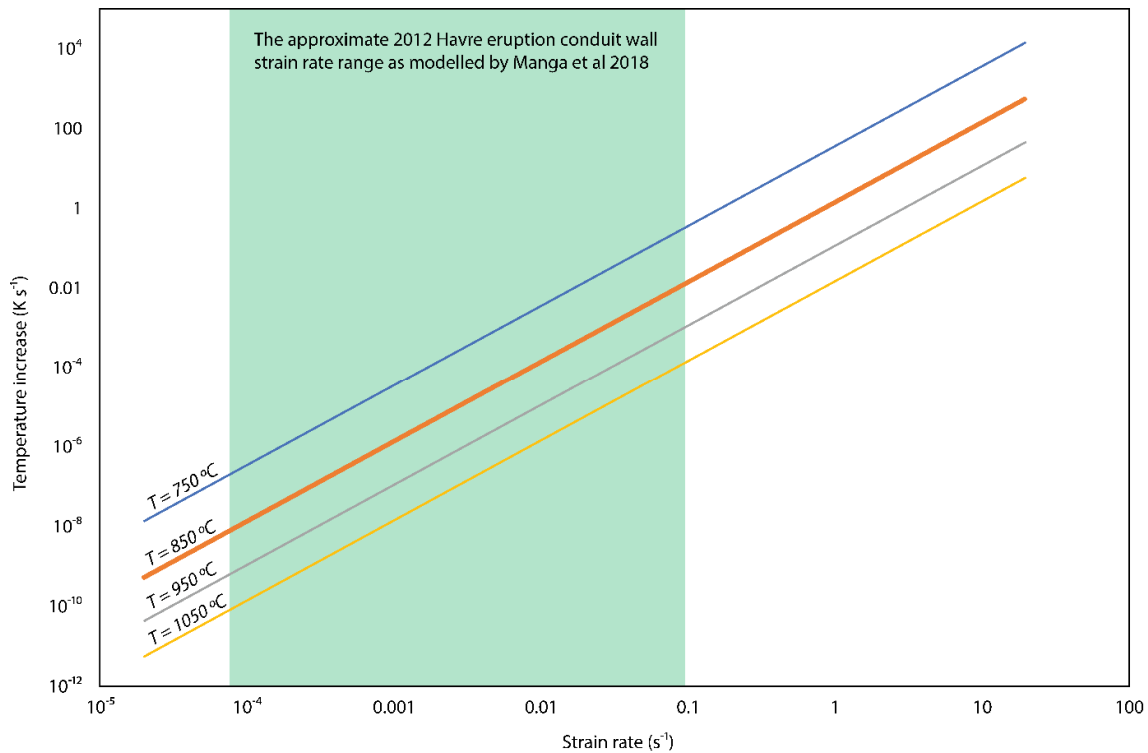

105

106 The rate of viscous heating ( $dT/dt$ ) for the Havre magma over a range of temperatures and a range of  
107 strain rates ( $\gamma'$ ) calculated using equation (6) from Hess et al. (2008).

$$\frac{dT}{dt} = \frac{\mu \cdot \gamma'^2}{\rho \cdot C_p}$$

108 Where  $\mu$  is the magma viscosity,  $\rho$  is the magma density here assumed to be  $2300 \text{ kg m}^{-3}$ , and  $C_p$  is  
109 the magma heat capacity. Conduit margin strain rates predicted by (Manga et al., 2018) during the  
110 Havre eruption range between  $\sim 10^{-4}$  to  $10^{-1} \text{ s}^{-1}$  producing negligible viscous heating at the estimated  
111 eruption temperature (850 °C).

## 112 References cited

- 113 Hess, K.U., Cordonnier, B., Lavallée, Y., and Dingwell, D.B., 2008, Viscous heating in rhyolite: An in  
114 situ experimental determination: *Earth and Planetary Science Letters*, v. 275, p. 121–126, doi:  
115 10.1016/j.epsl.2008.08.014.
- 116 Manga, M., et al., 2018, The pumice raft-forming 2012 Havre submarine eruption was effusive: *Earth*  
117 and *Planetary Science Letters*, v. 489, p. 49–58, <https://doi.org/10.1016/j.epsl.2018.02.025>.
